# Supplementary material for: 3D interconnected polymer/mesoporous silica nanoparticle hybrid materials with hierarchical macro/meso-structures for heavy metal adsorption
Source: Royal Society of Chemistry journal article supplement (doi:10.1039/d3nj05887e), 2024-01-01
Supplement: d3nj05887e1.pdf [file d3nj05887e1.pdf]

## Supporting Information

### **3D Interconnected Polymer/Mesoporous Silica Nanoparticle Hybrid Materials with Hierarchical Macro/Meso-structure for Heavy Metal Adsorption**

Jae-Seo Park,<sup>a,1</sup> Young Sunwoo,<sup>a,1</sup> Debabrata Chakraborty,<sup>b,1</sup> Chamila Gunathilake,<sup>c</sup> Yanhai Du,<sup>c</sup>  
and Eun-Bum Cho<sup>a,b,\*</sup>

*<sup>a</sup>Department of Fine Chemistry, Seoul National University of Science and Technology, 232  
Gongneung-ro, Nowon-gu, Seoul 01811, Republic of Korea*

*<sup>b</sup>Institute for Applied Chemistry, Seoul National University of Science and Technology, 232  
Gongneung-ro, Nowon-gu, Seoul 01811, Republic of Korea*

*<sup>c</sup>College of Aeronautics & Engineering, Aeronautics & Engineering Building, 1400, Lester A  
Lefton Esplanade, Kent, OH 44242*

| <b>Entry</b>     | <b>Table of contents</b>                                                                                                                                                           | <b>Page No.</b> |
|------------------|------------------------------------------------------------------------------------------------------------------------------------------------------------------------------------|-----------------|
| <b>Figure S1</b> | Nitrogen adsorption-desorption isotherms of (a) MSN-NH <sub>2</sub> , (b) NSI-304, (c) NSI-314, and (d) NSI-514 samples.                                                           | S2              |
| <b>Figure S2</b> | Nitrogen adsorption-desorption isotherms of (a) MSN-NH <sub>2</sub> , (b) NSI-304, (c) NSI-314, and (d) NSI-514 samples.                                                           | S3              |
| <b>Figure S3</b> | The adsorption of Pb <sup>2+</sup> , Cd <sup>2+</sup> , and Hg <sup>2+</sup> on NSI-514 as a function of pH (ranging from 1.0 to 9.0) was characterized by the removal efficiency. | S4              |
| <b>Figure S4</b> | Recyclability of NIS-514 towards heavy metal ion (Pb, Cd and Hg) uptake.                                                                                                           | S5              |
| <b>Figure S5</b> | The chemisorption mechanism of Pb <sup>2+</sup> , Cd <sup>2+</sup> , and Hg <sup>2+</sup> on PEI/MSN-nanocomposite silica materials.                                               | S6              |

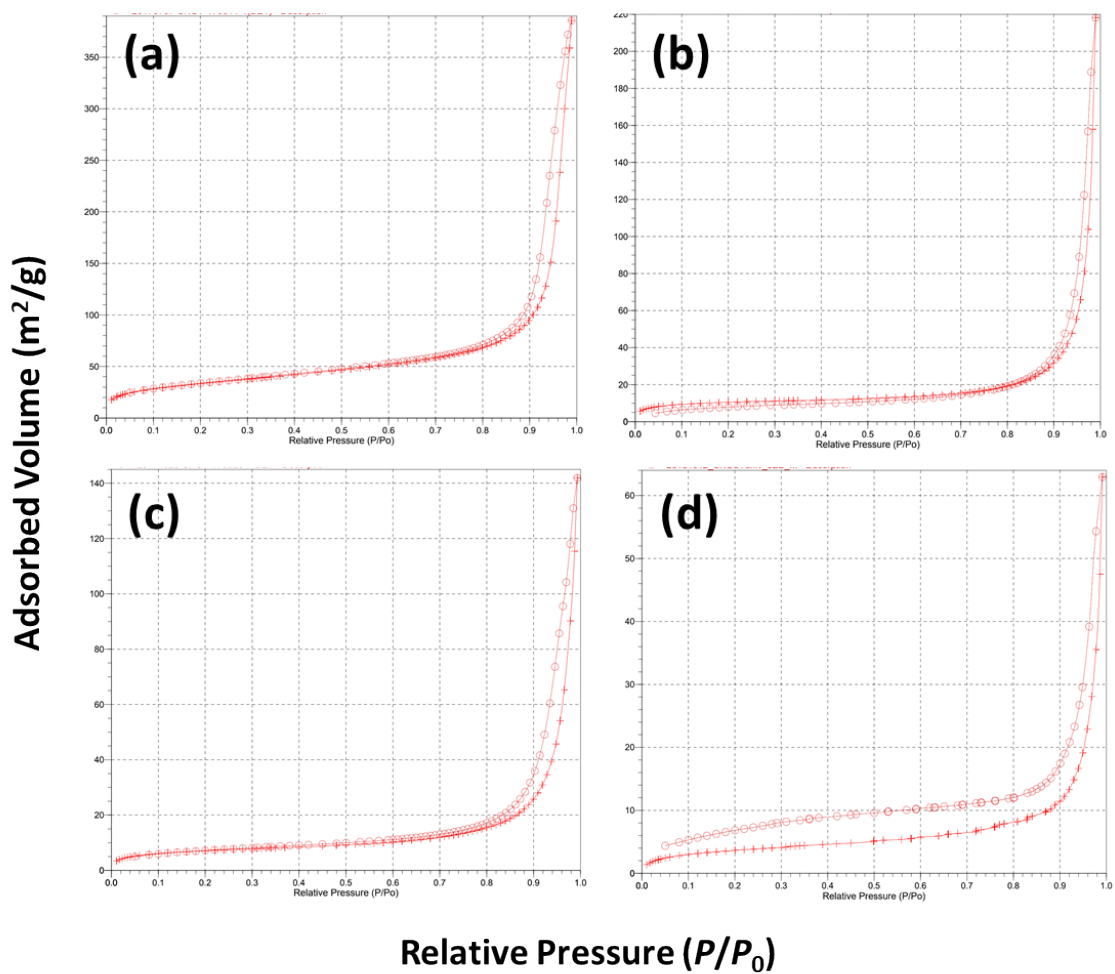

**Figure S1.** Nitrogen adsorption-desorption isotherms of (a) MSN-NH<sub>2</sub>, (b) NSI-304, (c) NSI-314, and (d) NSI-514 samples.

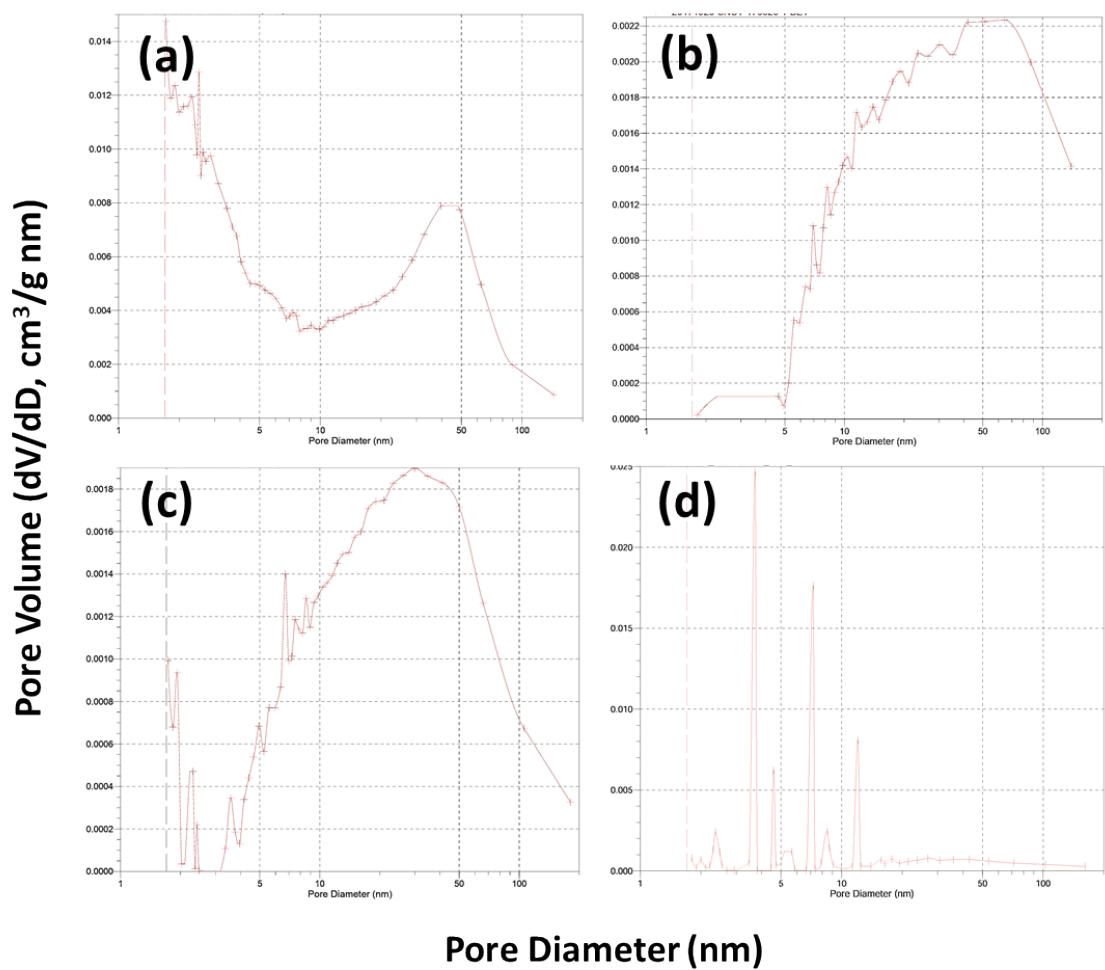

**Figure S2.** Pore size distribution of (a) MSN-NH<sub>2</sub>, (b) NSI-304, (c) NSI-314, and (d) NSI-514 samples.

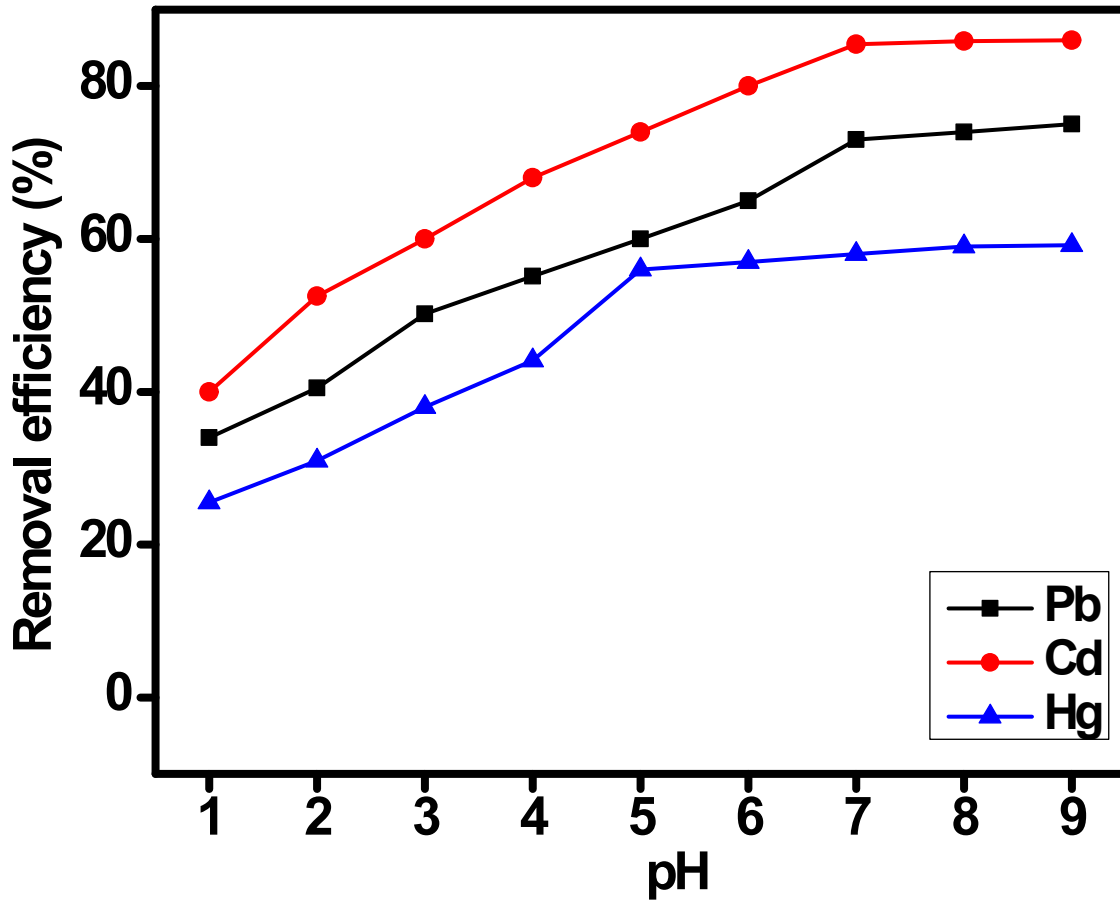

**Figure S3.** The adsorption of  $\text{Pb}^{2+}$ ,  $\text{Cd}^{2+}$ , and  $\text{Hg}^{2+}$  on NSI-514 as a function of pH (ranging from 1.0 to 9.0) was characterized by the removal efficiency.

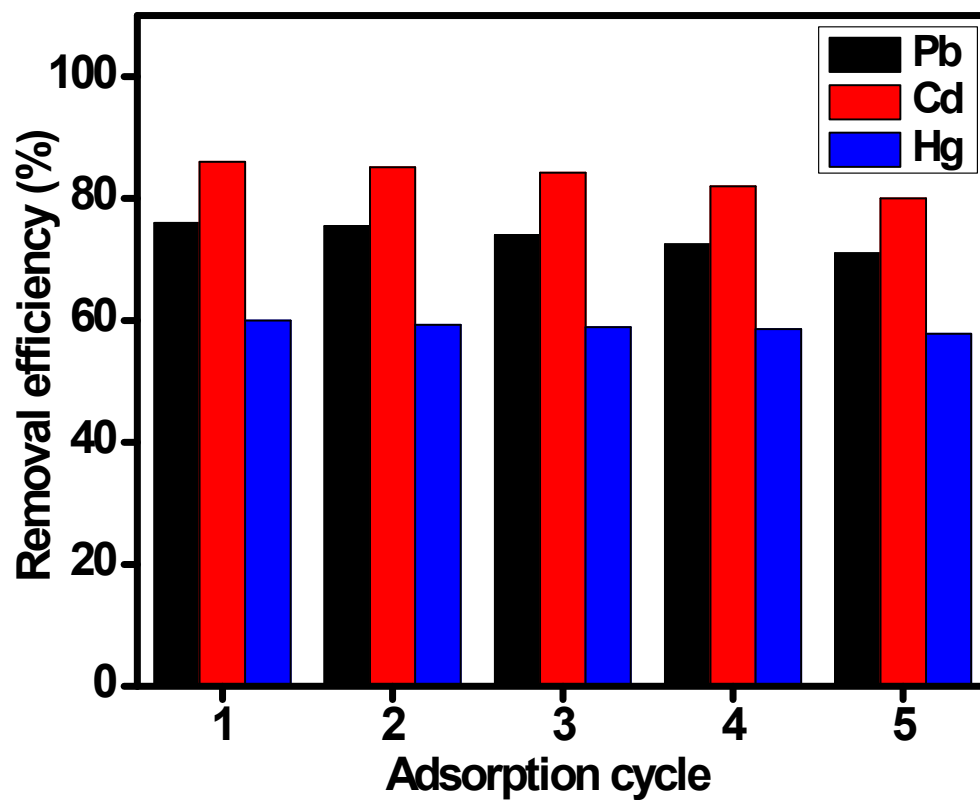

**Figure S4.** Recyclability of NIS-514 towards heavy metal ion (Pb, Cd and Hg) uptake.

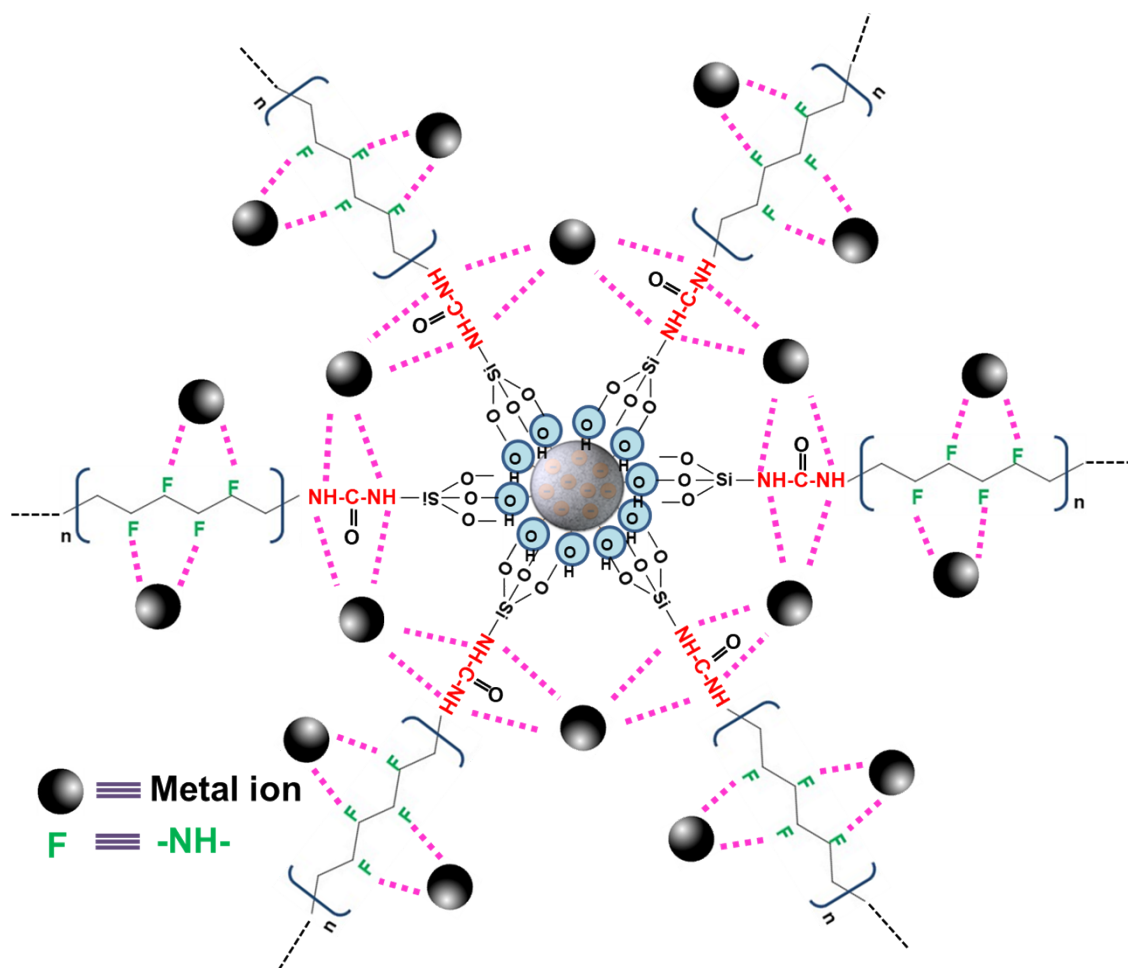

**Figure S5.** The chemisorption mechanism of  $\text{Pb}^{2+}$ ,  $\text{Cd}^{2+}$ , and  $\text{Hg}^{2+}$  on PEI/MSN-nanocomposite silica materials.
